# Supplementary material
Source: PubMed Central journal article supplement (PMC7370702)
Supplement: NIHMS1598159-supplement-Supplementary_Tables.pdf [file NIHMS1598159-supplement-Supplementary_Tables.pdf]

## SUPPLEMENTAL INFORMATION

**Supplementary Table S1. FAM-CAM in relation to CAM for overall sample (N=108)**

|                  | CAM<br>positive | CAM<br>negative | Total |
|------------------|-----------------|-----------------|-------|
| FAM-CAM positive | 17              | 13              | 30    |
| FAM-CAM negative | 13              | 65              | 78    |
| Total            | 30              | 78              | 108   |

*Note.* Data presented in N of patients.

**Supplementary Table S2. FAM-CAM in relation to CAM for patients with dementia (N=55)**

|                  | CAM<br>positive | CAM<br>negative | Total |
|------------------|-----------------|-----------------|-------|
| FAM-CAM positive | 13              | 9               | 22    |
| FAM-CAM negative | 9               | 24              | 33    |
| Total            | 22              | 33              | 55    |

*Note.* Data presented in N of patients.

**Supplementary Table S3. FAM-CAM in relation to CAM for patients without dementia (N=53)**

|                  | CAM<br>positive | CAM<br>negative | Total |
|------------------|-----------------|-----------------|-------|
| FAM-CAM positive | 4               | 4               | 8     |
| FAM-CAM negative | 4               | 41              | 45    |
| Total            | 8               | 45              | 53    |

*Note.* Data presented in N of patients.
